# Supplementary material for: Synthesis, in silico screening and preclinical evaluation studies of a hexapeptide analogue for its antimicrobial efficacy
Source: Royal Society of Chemistry journal article supplement (doi:10.1039/c5ra14936c), 2015-01-01

### Supplementary data

#### Synthesis, in-silico screening and preclinical evaluation studies of hexapeptide analogue for its antimicrobial efficacy

Ankur Kaul, Anjani K. Tiwari, Raunak Varshney, and Anil K. Mishra

**Table S1- Interaction residues of control ligands with pdb**

| Control ligands | H bond                                                                                                                       | Salt bridges | Pi cation        | Bond length with Lys 274 |
|-----------------|------------------------------------------------------------------------------------------------------------------------------|--------------|------------------|--------------------------|
| cephalexin      | Lys 274, val 354, Tyr 315, Gln 271, Glu 233                                                                                  | Arg 325      | Lys 274          | 1.79, 3.91               |
| cefotaxime      | Glu 290, Arg 286, Arg 286, Lys 274, Asn 275, Gly 259                                                                         | Lys 274      |                  | 3.85, 2.75               |
| vancomycin      | Leu 278, Leu 278, Asn 275, Glu 211, Glu 211, Glu 323, Glu 281, Gly 259, Lys 274                                              | Lys 274      | Arg 286, Arg 325 | 1.98                     |
| ciprofloxacin   | Asn 275, Val 354,                                                                                                            | Glu 323      | Arg 325          |                          |
| menomycin       | Leu 278, Ser 279, Lys 355, Gln 271, Try 315, Lys 274, Lys 274, Gly 259, Tyr 360, Arg 286, Glu 281, Glu 211, Asn 275, Arg 325 |              |                  | 1.89,1.79                |
| AMP             | Glu 323, Glu 323, Glu 281, Lys 274, Lys 274, Ser 358, Ser 358, Arg 364, Thr 257, Glu 233                                     |              |                  | 1.94, 2.79               |

**Table S2- Interactive score with different control**

| ligand                     | GScore | DockScore | LipophilicEvdW | HBond  | Electro | HBond  | Electro |
|----------------------------|--------|-----------|----------------|--------|---------|--------|---------|
| 3VMAppwduplicate_molecule1 | -14.24 | -14.24    | -2.03          | -10.23 | -2      | -10.23 | -2      |
| sequence_pep.mol           | -9.22  | -9.22     | -3.04          | -3.7   | -3.3    | -3.7   | -3.3    |
| ciprofloxacin              | -4.55  | -3.25     | -1.18          | -2.4   | -0.95   | -2.4   | -0.95   |
| Vancomycin1.mol-2          | -8     | -6.81     | -2.78          | -3.75  | -2      | -3.75  | -2      |
| Cefotaxime1.mol            | -5.17  | -5.17     | -1.49          | -2.67  | -1.3    | -2.67  | -1.3    |
| Cephalexin1.mol            | -4.4   | -4.34     | -0.91          | -1.83  | -2.31   | -1.83  | -2.31   |

Fig F1- 2D and 3D interaction diagram with cefotaxime

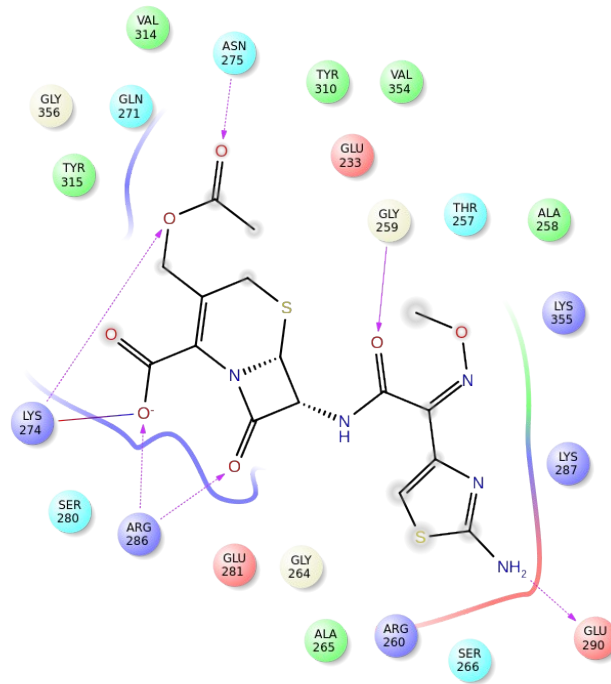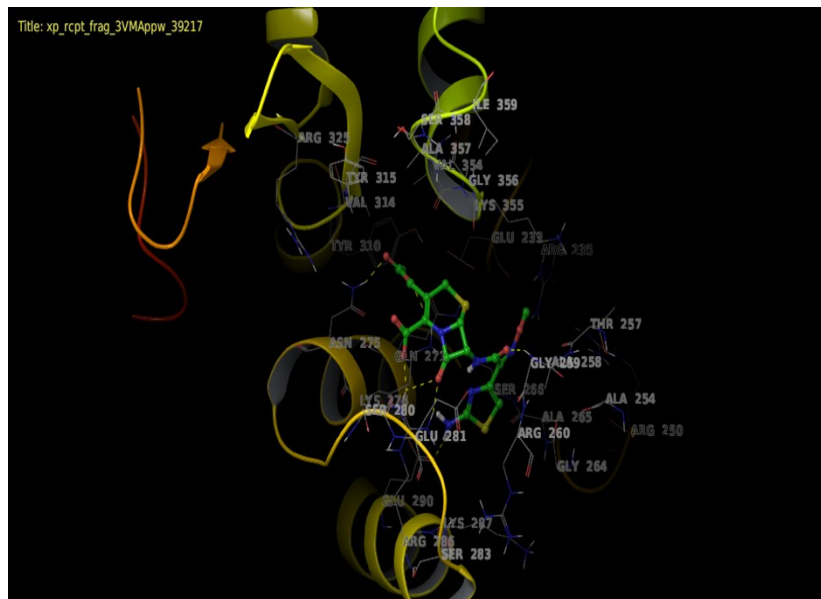

Fig F2- 2D and 3D interaction diagram with cephalixin

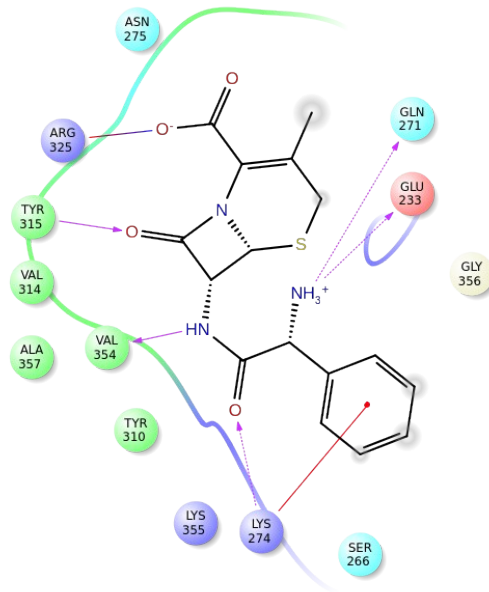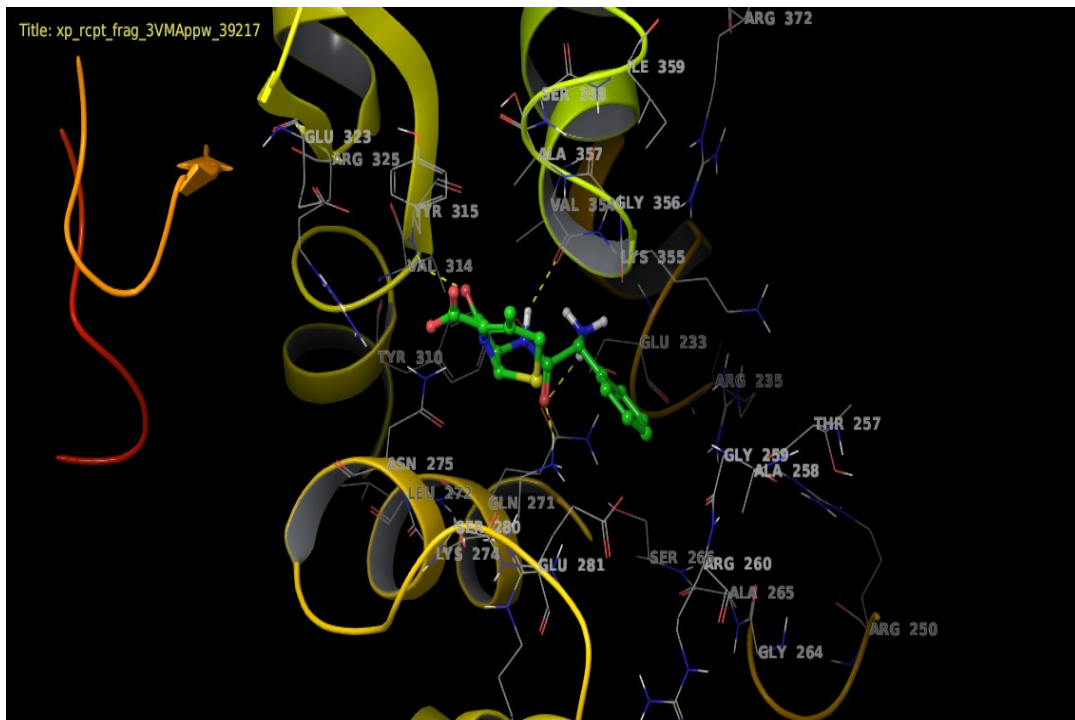

Fig F3- 2D and 3D interaction diagram with ciprofloxacin

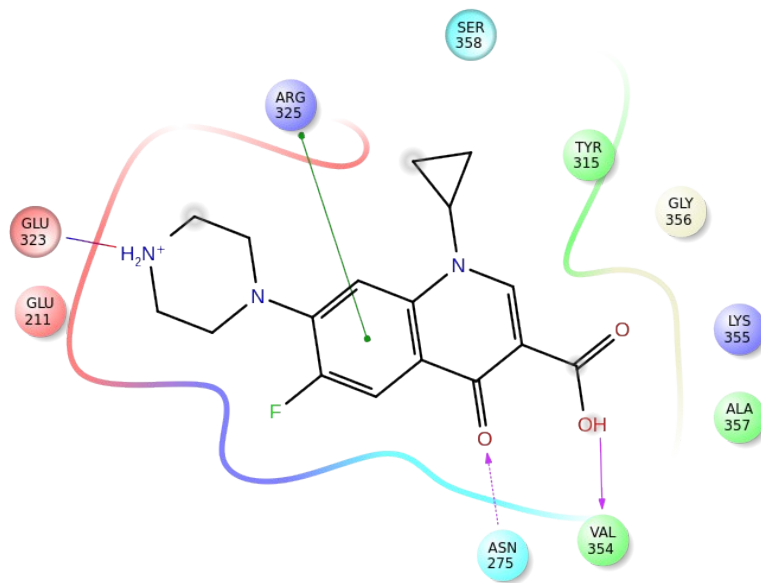

Title: xp\_rcpt\_frag\_3VMAppw\_3060

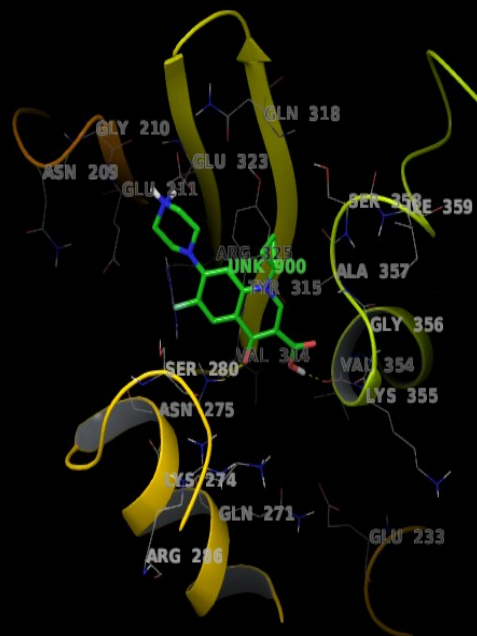

Fig F4- 2D and 3D interaction diagram with vancomycin

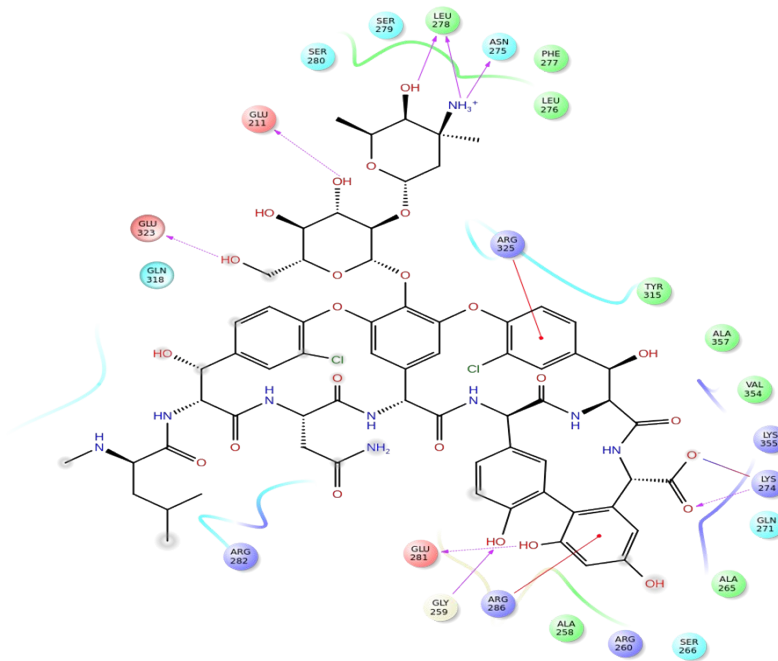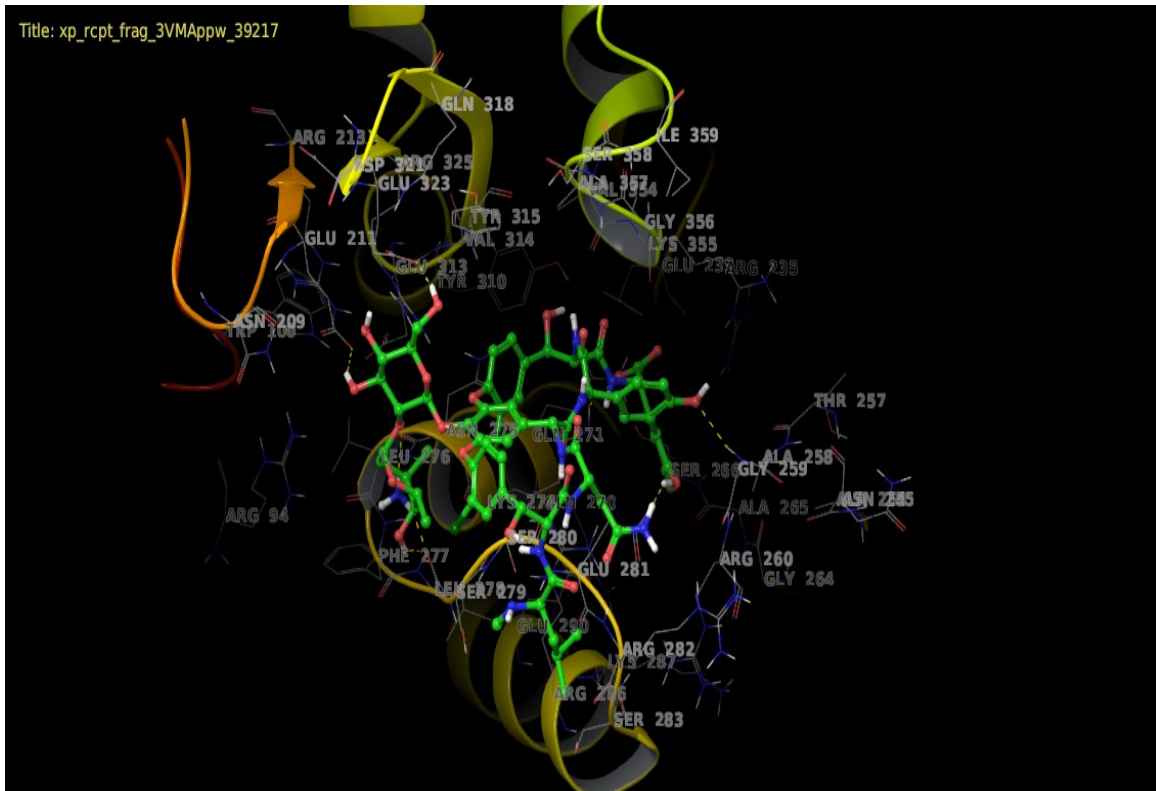

Supplement: c5ra14936c1.pdf [file c5ra14936c1.pdf]
